# Supplementary material for: The effect of remnant forest on insect successional response in tropical fire-impacted peatland: A bi-taxa comparison
Source: PLOS journal article supplement (doi:10.1371/journal.pone.0174388), 2017-03-23
Supplement: S2 (10.1371/journal.pone.0174388.s002) [file journal.pone.0174388.s002]

**S2 Table. Abundance of ant assemblages in remnant forests, sites close to remnant forests, and sites distant from remnant forests.** Ants were categorized based on functional groups: Cryptic (C): abundant and diverse in forests, nest underground or in dead plant materials; Dominant Dolichoderinae (DD): numerically and behaviorally dominant group in open environments; Generalized Myrmicinae (GM): widespread group, armed with chemical defenses and often show resource monopolization; Hot-climate Specialists (HCS): highly adaptable to extreme heat and distribution limited to arid regions; Opportunists (O): widespread group, especially when ant diversity is low, and less competitive and unspecialized in ecological function; Subordinate Camponotini (SC): generally present in areas with high diversity of the ant community and often show apparent niche separation with DD; Specialist Predators (SP): specialization on certain arthropod prey; Tropical-climate Specialists (TCS): Hot-specialized ant group with distribution limited to the tropics [39,40].

| Ant species                  | Remnant forests |    | Sites distant from remnant forests |    |    | Sites close to remnant forests |    |    |    |
|------------------------------|-----------------|----|------------------------------------|----|----|--------------------------------|----|----|----|
|                              | F2              | F3 | D3                                 | D4 | D1 | A1                             | A2 | A5 | A6 |
| Cryptic species (C)          |                 |    |                                    |    |    |                                |    |    |    |
| <i>Pheigeleton</i> sp. 1     | 500             | 5  | 0                                  | 0  | 0  | 21                             | 0  | 0  | 0  |
| <i>Pheigeleton</i> sp. 2     | 0               | 4  | 0                                  | 0  | 0  | 0                              | 0  | 0  | 0  |
| Dominant Dolichoderinae (DD) |                 |    |                                    |    |    |                                |    |    |    |
| <i>Iridomyrmex anceps</i>    | 0               | 0  | 3                                  | 2  | 97 | 3                              | 76 | 36 | 43 |
| <i>Iridomyrmex</i> sp. 2     | 0               | 0  | 0                                  | 0  | 26 | 0                              | 0  | 0  | 2  |
| Generalized Myrmicinae (GM)  |                 |    |                                    |    |    |                                |    |    |    |
| <i>Pheidole</i> sp. 1        | 0               | 4  | 8                                  | 0  | 5  | 0                              | 0  | 0  | 0  |
| <i>Pheidole</i> sp. 2        | 0               | 0  | 9                                  | 23 | 29 | 3                              | 11 | 1  | 7  |
| <i>Pheidole</i> sp. 3        | 0               | 0  | 1                                  | 0  | 0  | 0                              | 1  | 0  | 0  |
| <i>Pheidole</i> sp. 4        | 32              | 8  | 0                                  | 0  | 0  | 6                              | 8  | 7  | 0  |
| <i>Crematogaster</i> sp. 1   | 1               | 0  | 0                                  | 0  | 0  | 0                              | 0  | 0  | 0  |

|                                    |   |    |    |   |     |    |   |   |    |
|------------------------------------|---|----|----|---|-----|----|---|---|----|
| <i>Monomorium</i> sp. 1            | 0 | 0  | 2  | 0 | 0   | 1  | 4 | 0 | 0  |
| <i>Monomorium</i> sp. 2            | 0 | 0  | 0  | 0 | 0   | 5  | 0 | 0 | 0  |
| Hot-climate Specialists (HCS)      |   |    |    |   |     |    |   |   |    |
| <i>Meranoplus</i> sp. 1            | 0 | 1  | 0  | 0 | 0   | 0  | 0 | 0 | 0  |
| Opportunists (O)                   |   |    |    |   |     |    |   |   |    |
| <i>Paratrechina</i> sp. 1          | 3 | 1  | 5  | 0 | 274 | 35 | 9 | 0 | 14 |
| <i>Nylanderia</i> sp. 1            | 2 | 4  | 0  | 0 | 24  | 1  | 5 | 6 | 16 |
| <i>Diacamma</i> sp. 1              | 2 | 0  | 0  | 3 | 0   | 0  | 0 | 0 | 0  |
| <i>Tetramorium</i> sp. 1           | 1 | 0  | 0  | 0 | 0   | 0  | 0 | 0 | 0  |
| <i>Tapinoma</i> sp. 1              | 0 | 1  | 0  | 0 | 1   | 0  | 0 | 0 | 0  |
| <i>Odontomachus rixosus</i>        | 0 | 2  | 0  | 0 | 0   | 0  | 0 | 0 | 0  |
| <i>Odontomachus</i> sp. 2          | 0 | 0  | 1  | 0 | 0   | 0  | 1 | 0 | 0  |
| <i>Odontomachus</i> sp. 3          | 0 | 0  | 0  | 0 | 0   | 0  | 2 | 6 | 0  |
| Subordinate Camponotini (SC)       |   |    |    |   |     |    |   |   |    |
| <i>Camponotus</i> sp. 1            | 0 | 0  | 0  | 0 | 1   | 0  | 0 | 0 | 0  |
| Specialist Predator (SP)           |   |    |    |   |     |    |   |   |    |
| <i>Leptogenys</i> sp. 1            | 1 | 0  | 0  | 0 | 0   | 0  | 0 | 0 | 0  |
| <i>Odontoponera transversa</i>     | 0 | 0  | 0  | 0 | 0   | 9  | 3 | 2 | 3  |
| <i>Pachycondyla</i> sp. 1          | 0 | 0  | 0  | 0 | 0   | 1  | 0 | 0 | 0  |
| Tropical-climate Specialists (TCS) |   |    |    |   |     |    |   |   |    |
| <i>Anoplolepis gracilipes</i>      | 4 | 0  | 67 | 0 | 55  | 0  | 0 | 0 | 32 |
| <i>Euprenolepis</i> sp. 1          | 7 | 20 | 0  | 0 | 0   | 0  | 0 | 0 | 0  |

|                                    |   |     |   |   |   |   |   |   |   |
|------------------------------------|---|-----|---|---|---|---|---|---|---|
| <i>Dolichoderus</i> sp.1           | 0 | 11  | 0 | 0 | 0 | 0 | 0 | 0 | 0 |
| <i>Dolichoderus bituberculatus</i> | 0 | 141 | 0 | 0 | 0 | 0 | 0 | 0 | 0 |
| <i>Gnamptogenys</i> sp. 1          | 0 | 0   | 0 | 0 | 0 | 0 | 2 | 1 | 4 |

---
